# Supplementary material for: Photoinduced bending of a coumarin-containing supramolecular polymer
Source: Royal Society of Chemistry journal article supplement (doi:10.1039/b814278e), 2008-11-14
Supplement: b814278e.pdf [file b814278e.pdf]

# Photoinduced Bending of A Coumarin-Containing Supramolecular Polymer

Jie He, Yi Zhao, Yue Zhao\*

Département de chimie, Université de Sherbrooke, Sherbrooke, Québec, Canada J1K 2R1

## 1. Materials

All chemicals were purchased from Aldrich and used as received. The coumarin-containing carboxylic acids were synthesized according to a modified literature method (Scheme 1).<sup>1</sup>

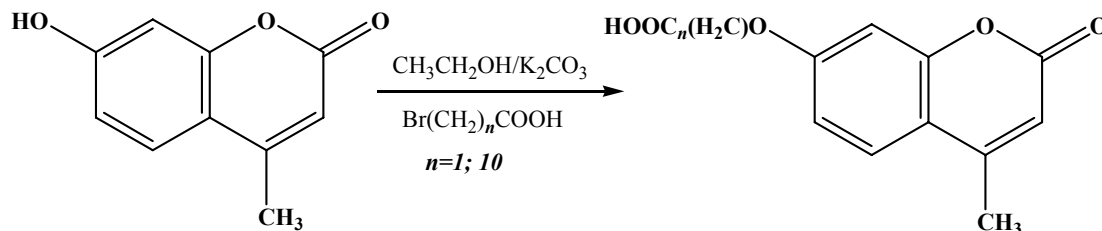

Scheme S1. Synthesis of coumarin-containing carboxylic acids

**Synthesis of 7-(carboxymethoxy)-4-methylcoumarin (n=1):** 2-Bromoacetic acid (2.0 g, 14.5 mmol), 7-hydroxy-4-methylcoumarin (2.0 g, 11.3 mmol), potassium carbonate (4.8 g, 35 mmol), a trace of potassium iodide and 150 mL of ethanol were placed into a 250 mL round bottomed flask equipped with a magnetic stirrer and heated under reflux for 20 h. The mixture was then poured into 200 mL of water, and the pH value of the solution was adjusted to be  $\sim 5$  by adding hydrochloric acid (5 wt%). After evaporation of the ethanol at room temperature, a white precipitate was filtered off, and washed with water twice. Yield: 64%. MS (m/e): 234 ( $\text{M}^+$ ).  $^1\text{H}$  NMR ( $d_6$ -DMSO, ppm,  $\delta$ ): 13.1 (w, 1H, -COOH), 7.7 (d, 1H, aromatic hydrogen), 6.9 (t, 2H, aromatic hydrogen), 6.2 (m, 1H, =C-H), 4.8 (m, 2H, -CH<sub>2</sub>-), 2.3 (m, 3H, -CH<sub>3</sub>).

**Synthesis of 7-(carboxydecyloxy)-4-methylcoumarin (n=10):** It was prepared by using the same procedure as described above, only with 11-bromoundecanoic acid replacing 2-bromoacetic acid. Yield: 58%. MS (m/e): 360( $\text{M}^+$ ).  $^1\text{H}$  NMR ( $d_6$ -DMSO, ppm,  $\delta$ ): 12.1 (w, 1H, -COOH),

7.67 (d, 1H, aromatic hydrogen), 6.94 (d, 2H, aromatic hydrogen), 6.2 (m, 1H, =C-H), 4.1 (t, 2H, -CH<sub>2</sub>-), 2.35 (m, 3H, -CH<sub>3</sub>), 2.16 (t, 2H, -CH<sub>2</sub>-), 1.69 (m, 2H, -CH<sub>2</sub>-), 1.5~1.0 (m, 14H, -CH<sub>2</sub>-).

### **Complexation of poly(4-vinyl pyridine) (P4VP) with 7-(carboxymethoxy)-4-methylcoumarin (CMC) and preparation of free-standing films**

For example, to prepare the sample of P4VP-CMC (10 mol% of CMC), 0.2 g of P4VP and 0.05 g of CMC were dissolved in 1.8 g DMF, the solution was stirred at room temperature for 24 h. Afterwards, the solution was cast onto a mold made with Teflon. After the removal of most solvent at room temperature, the film was further dried at 120°C for 12 h in a vacuum oven. The dried film of P4VP-CMC could easily be peeled off from the Teflon surface.

## **2. Characterizations**

<sup>1</sup>H NMR spectra were obtained using a Bruker Spectrometer (300 MHz, AC 300). Mass spectra were recorded on a Micromass ZAB-1F high-resolution mass spectrometer. Transmission FT-IR spectra were recorded on a Nicolet Avatar 370 spectrometer. Reflectance FT-IR spectra were recorded on a Nicolet Nexus 470 spectrometer equipped with accessories for reflectance spectra. UV-vis spectra were taken using a Varian 50 Bio spectrophotometer. A Perkin-Elmer DSC-7 differential scanning calorimeter was utilized to measure the glass transition temperature  $T_g$  of the samples (calibration with indium and heating rate of 10 °C min<sup>-1</sup>).  $T_g$  was taken as the midpoint of the step change in the heat flow. The photocrosslinking was performed by applying the UV light to one surface of the film placed in a home-made thermostat stage. Using a flexible light guide from a UV-Vis spot curing system (Novacure), UV light with adjustable spot size could easily be directed to the film. For the photodimerization of coumarin, a 320-500 nm filter was used to generate UV light at  $\lambda > 310$  nm (~750 mW cm<sup>-2</sup>), while for the photodimerization of anthracene, a 365 nm filter was used to obtain UV light centered at 365 nm (~90 mW cm<sup>-2</sup>). Finally, a UV-C Air sterilizer lamp (1.25 W) peaked at  $\lambda = 254$  nm was used for photocleavage of cyclobutane (photodecrosslinking).

### 3. Infrared and UV-Vis Spectra of P4VP-CMC

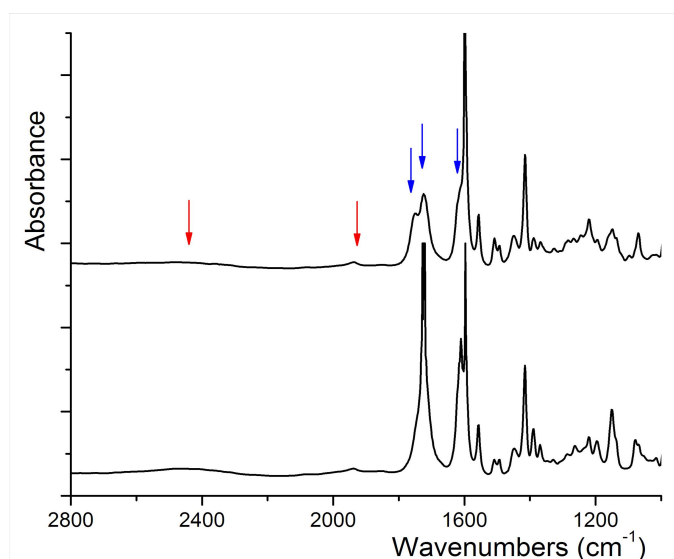

**Supporting Figure 1.** Transmittance IR spectra of a film of P4VP-CMC (10 mol% of CMC) before (down) and after (top) UV irradiation for photocrosslinking ( $\lambda > 310$  nm). Compared the spectrum before UV irradiation, the spectrum after UV irradiation displays a new absorption band for C=O at  $1750\text{ cm}^{-1}$  and a decrease in the intensity for the C=O band at  $1720\text{ cm}^{-1}$  and the C=C band at  $\sim 1610\text{ cm}^{-1}$  (marked by blue arrows), which confirms the photodimerization of coumarin groups.<sup>2</sup> On the other hand, the characteristic H-bonds between pyridine and carboxylic acid units, appearing around  $1940$  and  $2500\text{ cm}^{-1}$  (marked by red arrows),<sup>3</sup> can be noticed before and after the UV irradiation.

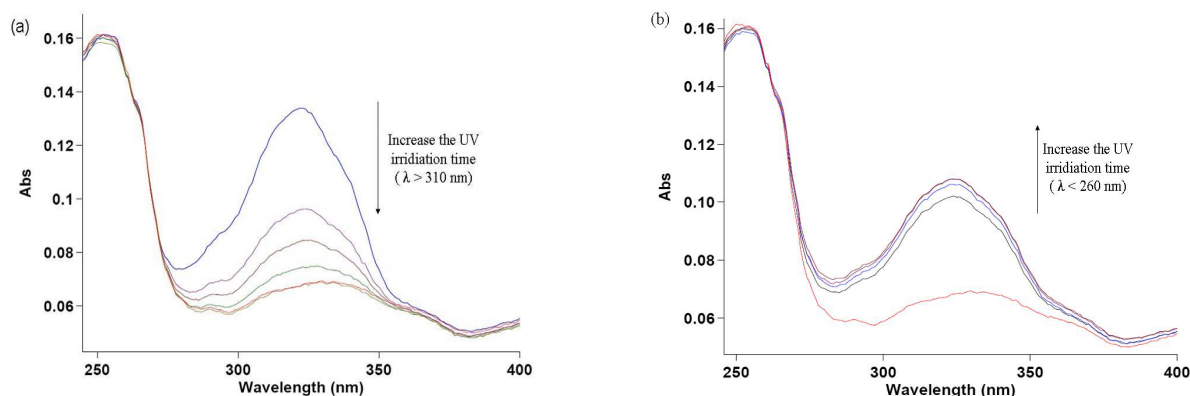

**Supporting Figure 2.** UV-vis spectra for a film of P4VP-CMC (10 mol% of CMC) recorded at 115°C: (a) upon UV irradiation at  $\lambda > 310$  nm, the decrease in absorbance at  $\sim 320$  nm indicates the photodimerization of coumarin groups, and (b) upon subsequent UV irradiation and  $\lambda < 260$  nm, the partial recovery of the absorbance indicates a partial photocleavage of cyclobutane groups. The spectra were taken with a time interval of 1 min. The film used in this experiment, solution cast and dried on a quartz plate, was much thinner than those used for the photoinduced bending experiments.

### 3. Photoinduced Bending of Other Systems

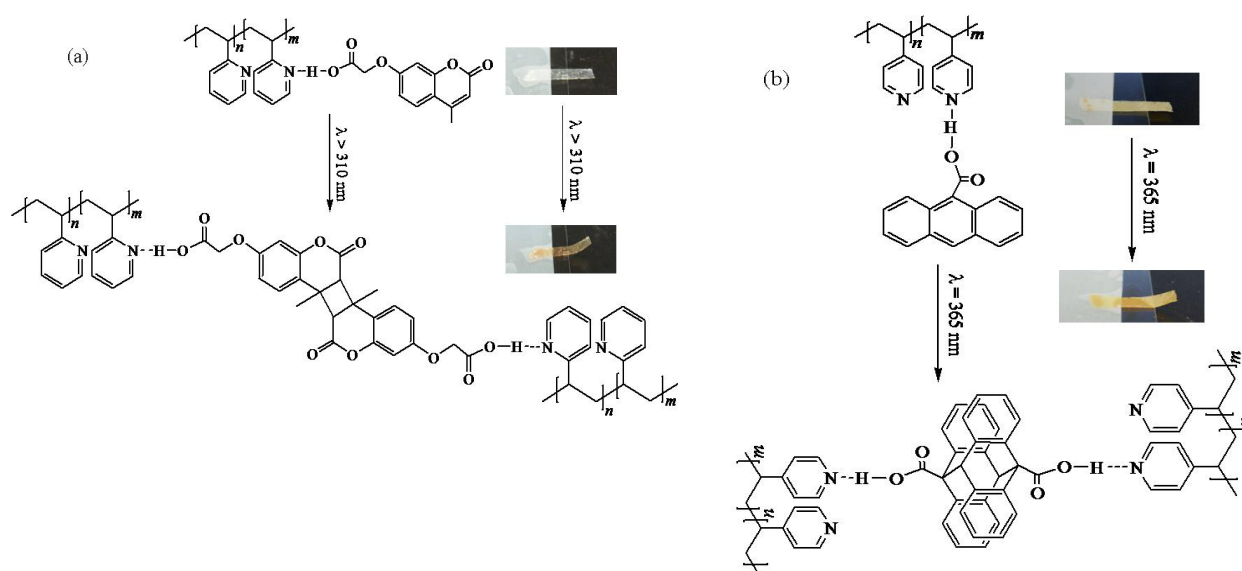

**Supporting Figure 3.** Photographs showing the photoinduced bending for (a) a film of poly(2-vinyl pyridine) (P2VP) complexed with 10 mol% of CMC, upon UV irradiation at  $\lambda > 310$  nm ( $750 \text{ mW cm}^{-2}$ ) and  $90^\circ\text{C}$ ; and (b) a film of P4VP complexed with 10 mol% of an anthracene carboxylic acid, upon UV irradiation at  $\lambda = 365$  nm ( $90 \text{ mW cm}^{-2}$ ) at  $115^\circ\text{C}$ . Irradiation time in both cases is 15 min.

### References

- (1) J. Jiang, B. Qi, M. Lepage and Y. Zhao, *Macromolecules* 2007, 40, 790-792.
- (2) J. Motoyanagi, T. Fukushima, N. Ishii and T. Aida, *J. Am. Chem. Soc.*, 2006, 128, 4220-4221.

Supplementary Material (ESI) for Soft Matter

This journal is (c) The Royal Society of Chemistry 2009

(3) T. Kato, N. Hirota, A. Fujishima and J. M. J. Frechet, *J. Polym. Sci., Part A, Polym. Chem.*, 1996, 34, 57-62.
